# Supplementary material for: Encapsulation of Phenolic Compounds from a Grape Cane Pilot-Plant Extract in Hydroxypropyl Beta-Cyclodextrin and Maltodextrin by Spray Drying
Source: MDPI journal article supplement (doi:10.3390/antiox10071130), 2021-07-15
Supplement: s1 [file s1]

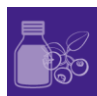

# Encapsulation of Phenolic Compounds from a Grape Cane Pilot-Plant Extract in Hydroxypropyl Beta-Cyclodextrin and Maltodextrin by Spray Drying

Danilo Escobar-Avello <sup>1,2</sup>, Javier Avendaño-Godoy <sup>3</sup>, Jorge Santos <sup>4,5</sup>, Julián Lozano-Castellón <sup>1,6</sup>, Claudia Mardones <sup>7</sup>, Dietrich von Baer <sup>7</sup>, Javiana Luengo <sup>3</sup>, Rosa M. Lamuela-Raventós <sup>1,6</sup>, Anna Vallverdú-Queralt <sup>1,6,\*</sup> and Carolina Gómez-Gaete <sup>2,3,\*</sup>

<sup>1</sup> Department of Nutrition, Food Science and Gastronomy XaRTA, Faculty of Pharmacy and Food Sciences Institute of Nutrition and Food Safety (INSA-UB), University of Barcelona, 08028 Barcelona, Spain; daniescobar01@ub.edu (D.E.-A.); julian.lozano@ub.edu (J.L.-C.); lamuela@ub.edu (R.M.L.-R.)

<sup>2</sup> Unidad de Desarrollo Tecnológico, Universidad de Concepción, 4191996 Coronel, Chile

<sup>3</sup> Departamento de Farmacia, Facultad de Farmacia, Universidad de Concepción, 4191996 Concepción, Chile; jaavendano@udec.cl (J.A.-G.); jluengo@udec.cl (J.L.)

<sup>4</sup> DEMad, Instituto Politécnico de Viseu, 3504-510 Viseu, Portugal; jsantos@estgv.ipv.pt (J.S.)

<sup>5</sup> LEPABE—Faculty of Engineering, University of Porto, 4200-465 Porto, Portugal

**Table S1:** Identification and quantification of phenolic compounds from GC<sub>PPE</sub> using LC-ESI-LTQ-Orbitrap-MS in negative mode.

| Compounds                                   | tR<br>(min) | Accurate mass<br>[M – H] <sup>–</sup> | mg/kg<br>DW |
|---------------------------------------------|-------------|---------------------------------------|-------------|
| <b>PHENOLIC ACIDS AND ALDEHYDES</b>         |             |                                       |             |
| Monogalloyl-glucose                         | 3.63        | 331.0668                              | 42 ± 6      |
| Gallic acid*                                | 4.29        | 169.0141                              | 279 ± 58    |
| Protocatechuic acid- <i>O</i> -hexoside (1) | 7.39        | 315.0719                              | 388 ± 53    |
| Protocatechuic acid                         | 7.67        | 153.0192                              | 266 ± 47    |
| Protocatechuic acid- <i>O</i> -hexoside (2) | 8.52        | 315.0718                              | NQ          |
| Syringic acid hexoside                      | 8.76        | 359.0981                              | NQ          |
| Caftaric acid                               | 9.27        | 311.0406                              | 135 ± 21    |
| Protocatechuic aldehyde                     | 9.47        | 137.0242                              | 711 ± 100   |
| Hydroxybenzoyl hexoside                     | 9.95        | 299.0770                              | 59 ± 10     |
| 4-Hydroxybenzoic acid*                      | 10.04       | 137.0243                              | 69 ± 8      |
| Coutaric acid                               | 11.17       | 295.0457                              | 97 ± 20     |
| Hydroxybenzaldehyde                         | 11.75       | 121.0294                              | 1295 ± 131  |
| Ellagic acid hexoside                       | 14.00       | 463.0518                              | NQ          |
| Gallic acid ethyl ester*                    | 14.30       | 197.0453                              | 45 ± 8      |
| Ellagic acid pentoside                      | 16.03       | 433.0410                              | 164 ± 16    |
| Ellagic acid*                               | 16.95       | 300.9986                              | 284 ± 7     |
| Ethyl protocatechuate                       | 18.58       | 181.0504                              | 283 ± 45    |
| <b>FLAVONOIDS</b>                           |             |                                       |             |
| <i>Flavanols</i>                            |             |                                       |             |
| Catechin*                                   | 11.40       | 289.0715                              | 249 ± 38    |
| Epicatechin*                                | 13.36       | 289.0714                              | NQ          |
| Procyanidin A-type dimer                    | 15.80       | 575.1194                              | NQ          |
| <i>Flavanones</i>                           |             |                                       |             |
| Eriodictyol- <i>O</i> -glucoside (1)        | 13.58       | 449.1090                              | NQ          |
| Eriodictyol- <i>O</i> -glucoside (2)        | 19.05       | 449.1089                              | NQ          |
| Eriodictyol*                                | 21.07       | 287.0555                              | 143 ± 34    |
| <i>Flavanonols</i>                          |             |                                       |             |
| Taxifolin*                                  | 17.03       | 303.0506                              | 269 ± 52    |
| Astilbin (1)                                | 17.39       | 449.1090                              | 1352 ± 208  |
| Astilbin (2)                                | 18.23       | 449.1084                              | 479 ± 76    |
| <i>Flavonols</i>                            |             |                                       |             |
| Quercetin- <i>O</i> -glucoside*             | 17.21       | 463.0879                              | 43 ± 7      |
| Quercetin-3- <i>O</i> -glucuronide*         | 17.28       | 477.0670                              | 85 ± 13     |
| Kaempferol-3- <i>O</i> -glucoside*          | 18.41       | 447.0930                              | NQ          |
| <b>STILBENES</b>                            |             |                                       |             |
| Resveratrol C-hexoside                      | 13.68       | 389.1238                              | NQ          |
| Restrytisol (A or B)                        | 15.12       | 471.1442                              | 421 ± 65    |
| Oxyresveratrol                              | 15.51       | 243.0659                              | NQ          |

|                                                  |       |          |            |
|--------------------------------------------------|-------|----------|------------|
| Oxidized stilbenoid dimer (1)                    | 16.19 | 471.1449 | NQ         |
| Stilbenoid dimer 1 (Caraphenol B/C)              | 17.81 | 469.1286 | 1683 ± 236 |
| Oxidized stilbenoid dimer (2)                    | 18.90 | 471.1446 | NQ         |
| Stilbenoid dimer 2 (heterodimer)                 | 19.26 | 469.1288 | NQ         |
| Pallidol                                         | 19.52 | 453.1341 | 393 ± 71   |
| ( <i>E</i> )-resveratrol*                        | 20.28 | 227.0709 | 502 ± 50   |
| Stilbene dimer (resveratrol dimer)               | 20.63 | 453.1338 | 239 ± 51   |
| Stilbenoid trimer                                | 20.77 | 681.2123 | NQ         |
| Resveratrol dimer- <i>O</i> -hexoside            | 20.85 | 615.1866 | NQ         |
| Stilbenoid dimer 3 (Scirpusin A)                 | 21.31 | 469.1289 | NQ         |
| Stilbenoid tetramer (Hopeaphenol/Isohopeaphenol) | 21.44 | 905.2580 | 974 ± 227  |
| ( <i>E</i> )- $\epsilon$ -viniferin*             | 21.69 | 453.1336 | 3962 ± 485 |

Data previously published by Escobar-Avello et al [2]. (\*) Identification by comparison with a standard. tR., retention time. Isomers are shown in parentheses. Quantification of phenolic compounds in a grape cane pilot plant extract (expressed in mg/kg DW). NQ means identified, but not quantified, due to their low levels (between LOD and LOQ). Results are expressed as means ± standard deviations.
